# Supplementary material for: Fractal structured charge-excitation triboelectric nanogenerators for powering portable electronic devices
Source: Royal Society of Chemistry journal article supplement (doi:10.1039/d2nr06328j), 2023-01-01
Supplement: d2nr06328j1.pdf [file d2nr06328j1.pdf]

## Supplementary information

### Fractal structure charge-excitation triboelectric nanogenerator for powering portable electronics

*Hairong Long,<sup>ab,⊥</sup> Jie An,<sup>b,⊥</sup> Shuxing Xu,<sup>ab</sup> Xiuhui Ni,<sup>cd</sup> Erming Su,<sup>ab</sup> Yingjin Luo,<sup>b</sup> Shijie  
Liu,<sup>be</sup> and Tao Jiang<sup>\*abe</sup>*

*<sup>a</sup>School of Chemistry and Chemical Engineering, Guangxi University, Nanning, Guangxi  
530004, P. R. China*

*<sup>b</sup>CAS Center for Excellence in Nanoscience, Beijing Key Laboratory of Micro-Nano Energy  
and Sensor, Beijing Institute of Nanoenergy and Nanosystems, Chinese Academy of Sciences,  
Beijing 101400, P. R. China*

*<sup>c</sup>Shandong Technological Center of Oceanographic Instrumentation Co., Ltd, Qingdao  
266001, P. R. China*

*<sup>d</sup>Institute of Oceanographic Instrumentation, QiLu University of Technology (Shandong  
Academy of Sciences), Qingdao 266001, P. R. China*

*<sup>e</sup>School of Nanoscience and Technology, University of Chinese Academy of Sciences, Beijing  
100049, P. R. China*

*\*Email address: jiangtao@binn.cas.cn (T. Jiang).*

*⊥These authors contributed equally to this work.*

## Supplementary figures

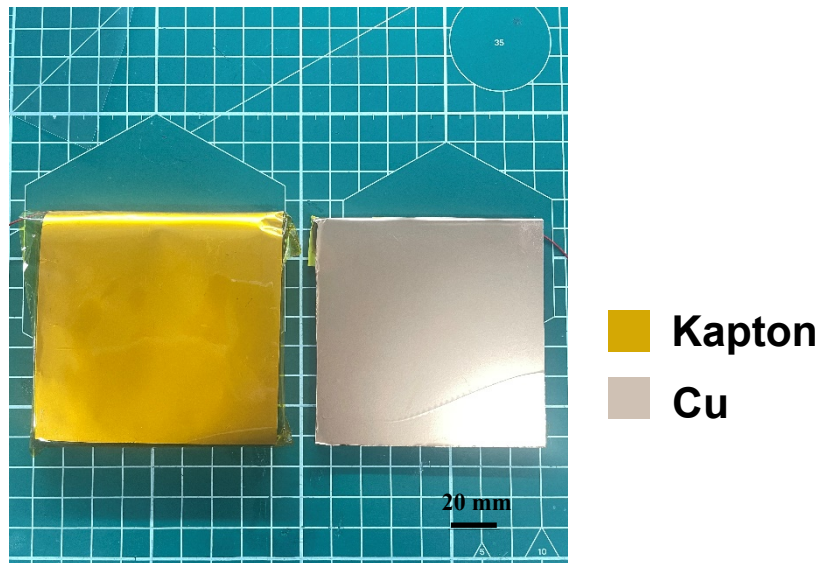

**Fig. S1** Photograph of the fabricated FSC-TENG device with the size of 100 mm  $\times$  100 mm.

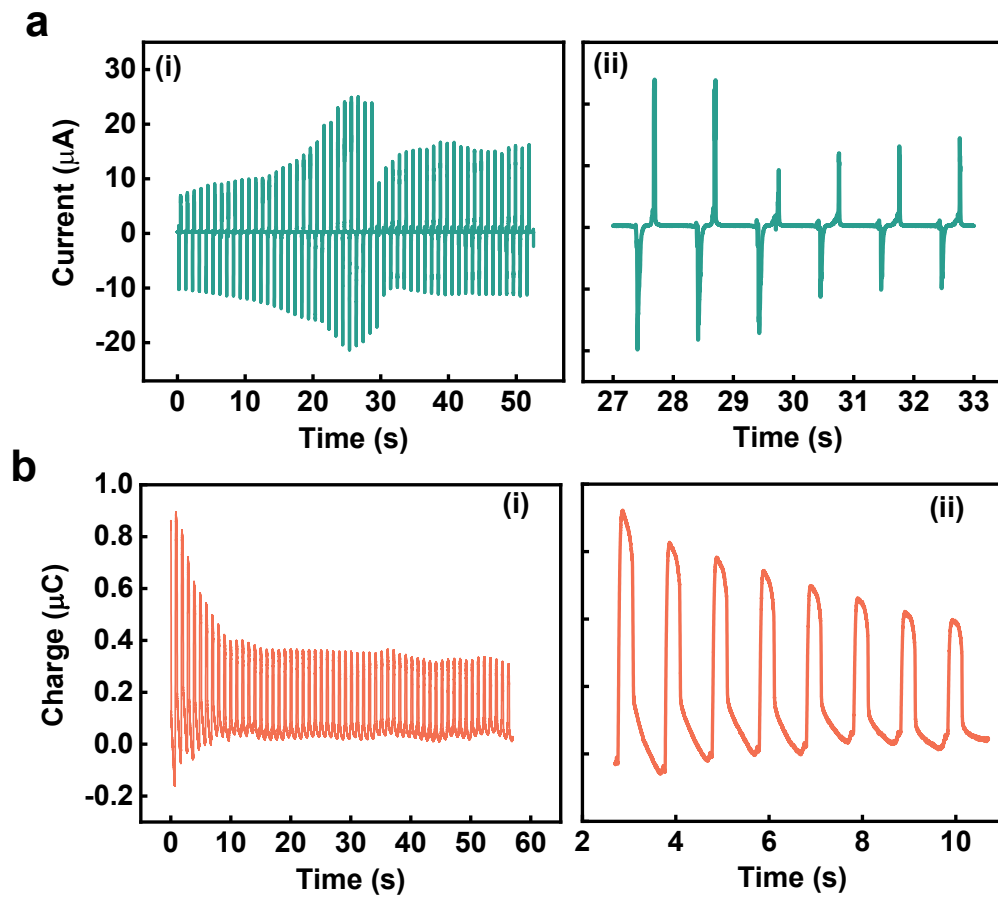

**Fig. S2** a) Short-circuit current, and b) transferred charge of the FSC-TENG without the regulator diodes.

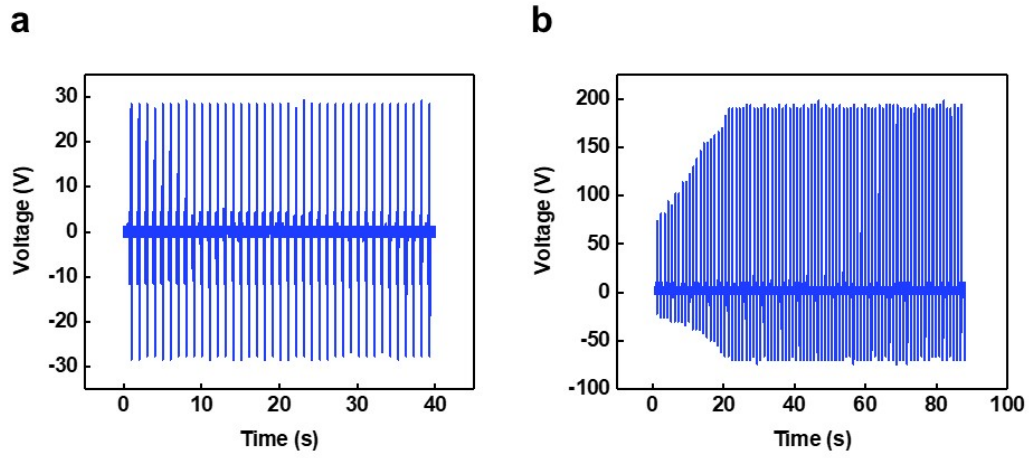

**Fig. S3** a) Output voltage of the TENG without charge excitation. b) Output voltage of the TENG with charge excitation.

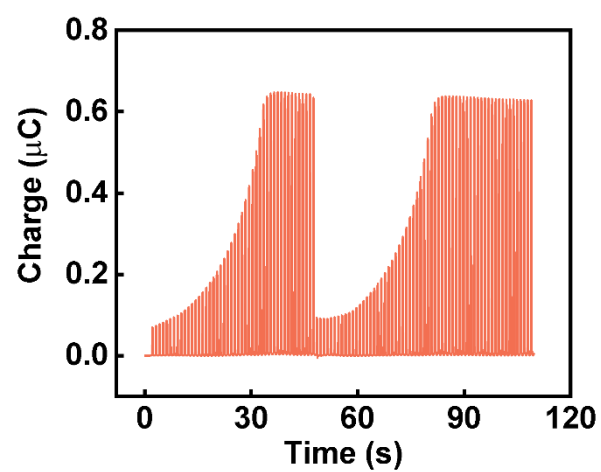

**Fig. S4** Transferred charge profile of the FSC-TENG retested after the discharging process at the frequency of 1 Hz when the linear motor continuously works.

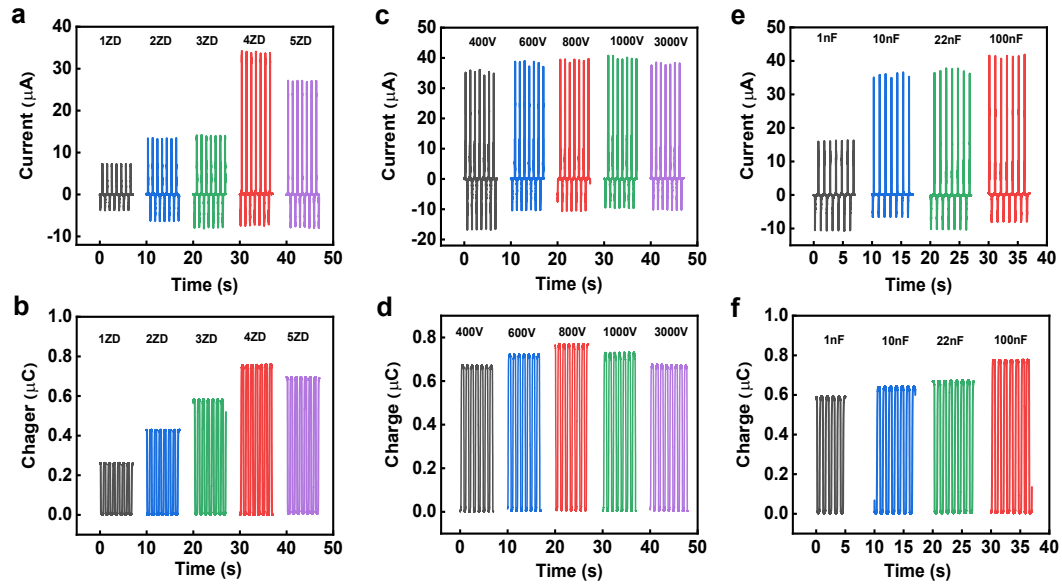

**Fig. S5** a-b) Effect of the diode withstand voltage diodes on the (a) short-circuit current, (b) transferred charge of the FSC-TENG devices. c-d) Effect of the capacitances of ceramic capacitors in the FSCC on the (c) short-circuit current, (d) transferred charge of the FSC-TENGs. e) Short-circuit current, f) transferred charge of the FSC-TENG devices for different numbers of regulator diodes.

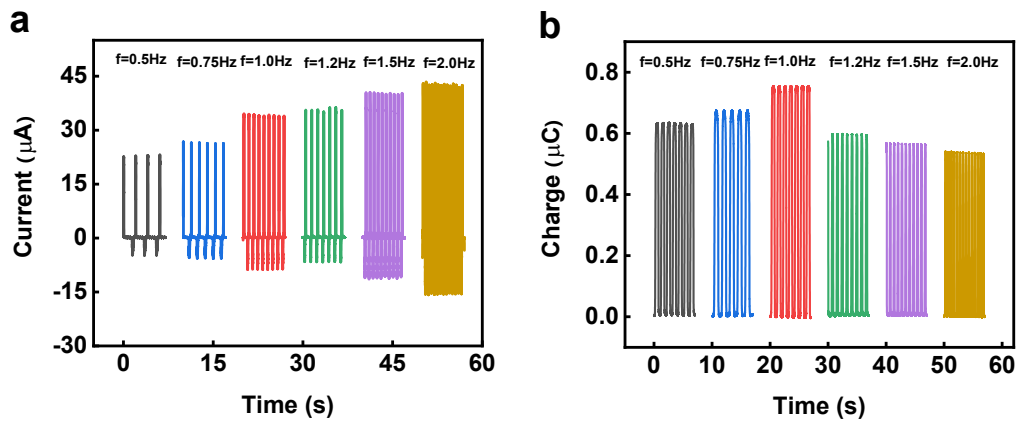

**Fig. S6** a) Short-circuit current, and b) transferred charge of the FSC-TENG obtained at different operating frequencies.

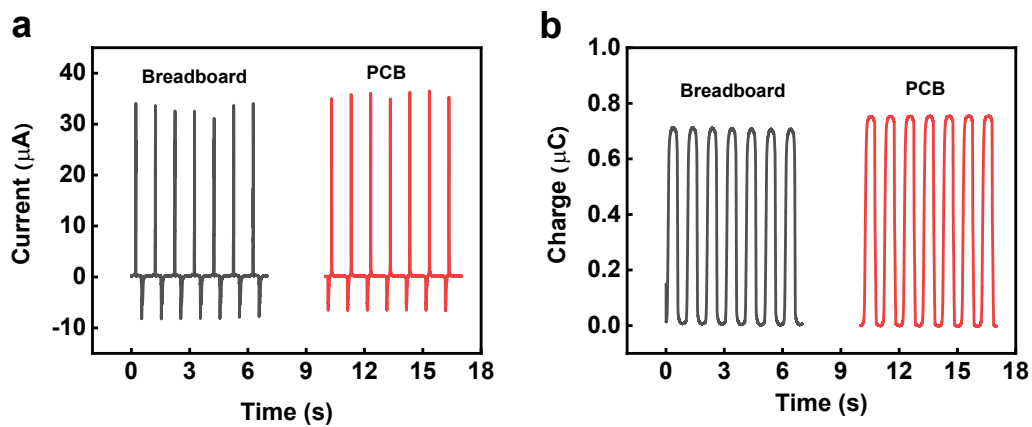

**Fig. S7** Comparison of the a) short-circuit current, and b) transferred charge of the FSC-TENG at 1 Hz when the electronic components are integrated on the breadboard and PCB.

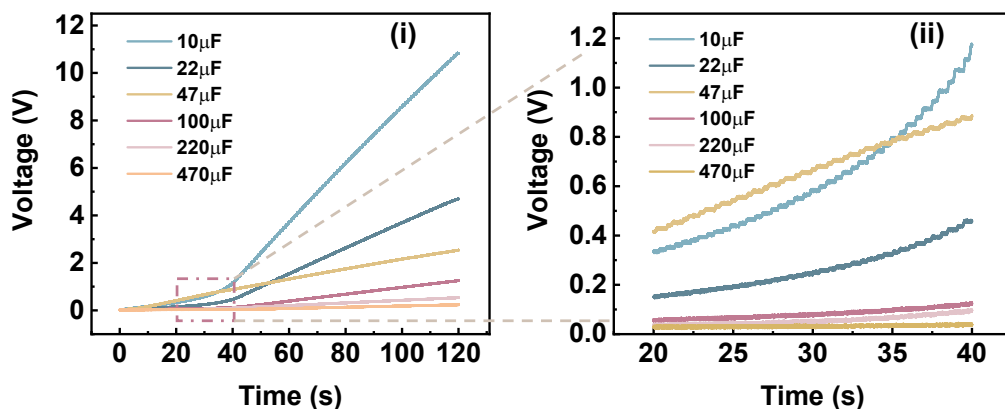

**Fig. S8** Charging voltage profiles for different capacitors at the unsaturated state, and enlarged view of the charging profiles during the charge excitation process.

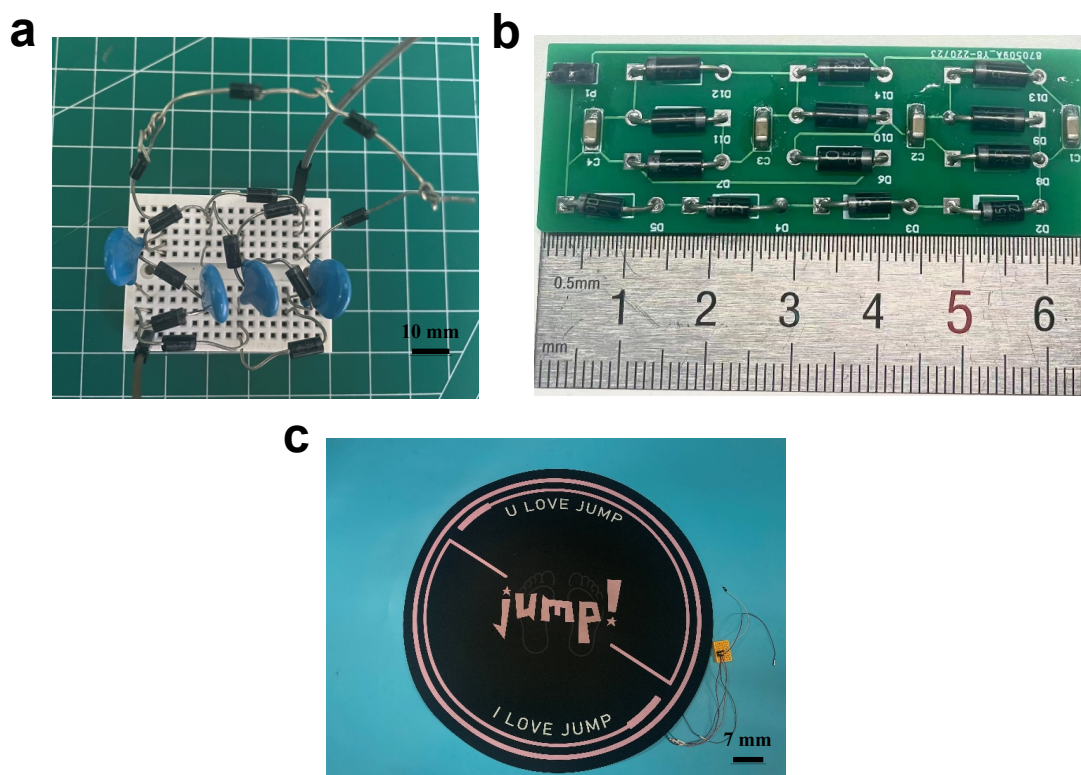

**Fig. S9** Photographs of the FSCC of  $4 = 2 \times 2$  structure when these components are integrated on a) the breadboard and b) the PCB. c) Photograph of the yoga mat integrated with the FSC-TENG.



## Supplementary Tables

**Table S1.** Parameters of the electronic components used in the FSCC.

### Diode

| Model  | Parameter    | Reverse leakage current |
|--------|--------------|-------------------------|
| 1N4004 | 1 A/400 V    | 5 $\mu$ A               |
| 1N4005 | 1 A/600 V    | 5 $\mu$ A               |
| BYV26D | 1 A/800 V    | 5 $\mu$ A               |
| 1N4007 | 1 A/1000 V   | 5 $\mu$ A               |
| R3000  | 0.2 A/3000 V | 5 $\mu$ A               |

### Ceramic capacitor

| Model | Withstand voltage |
|-------|-------------------|
| 102   | 2000 V            |
| 103   | 2000 V            |
| 223   | 2000 V            |
| 104   | 1000 V            |

**Video S1.** Recharging process of the FSC-TENG after the discharging process at the frequency of 2 Hz.

**Video S2.** Charging and discharging process of the capacitor by the FSC-TENG to power the hygrothermograph.

**Video S3.** Charging and discharging process of the capacitor by the FSC-TENG integrated with the yoga mat to power the electronic watch.

**Video S4.** Charging and discharging process of the capacitor by the FSC-TENG integrated with the yoga mat to power the pedometer.
